# Supplementary material
Source: publisher figshare collection journal article supplement (https://springernature.figshare.com/ndownloader/files/17280878)
Supplement: Supplementary file [file 17280878]

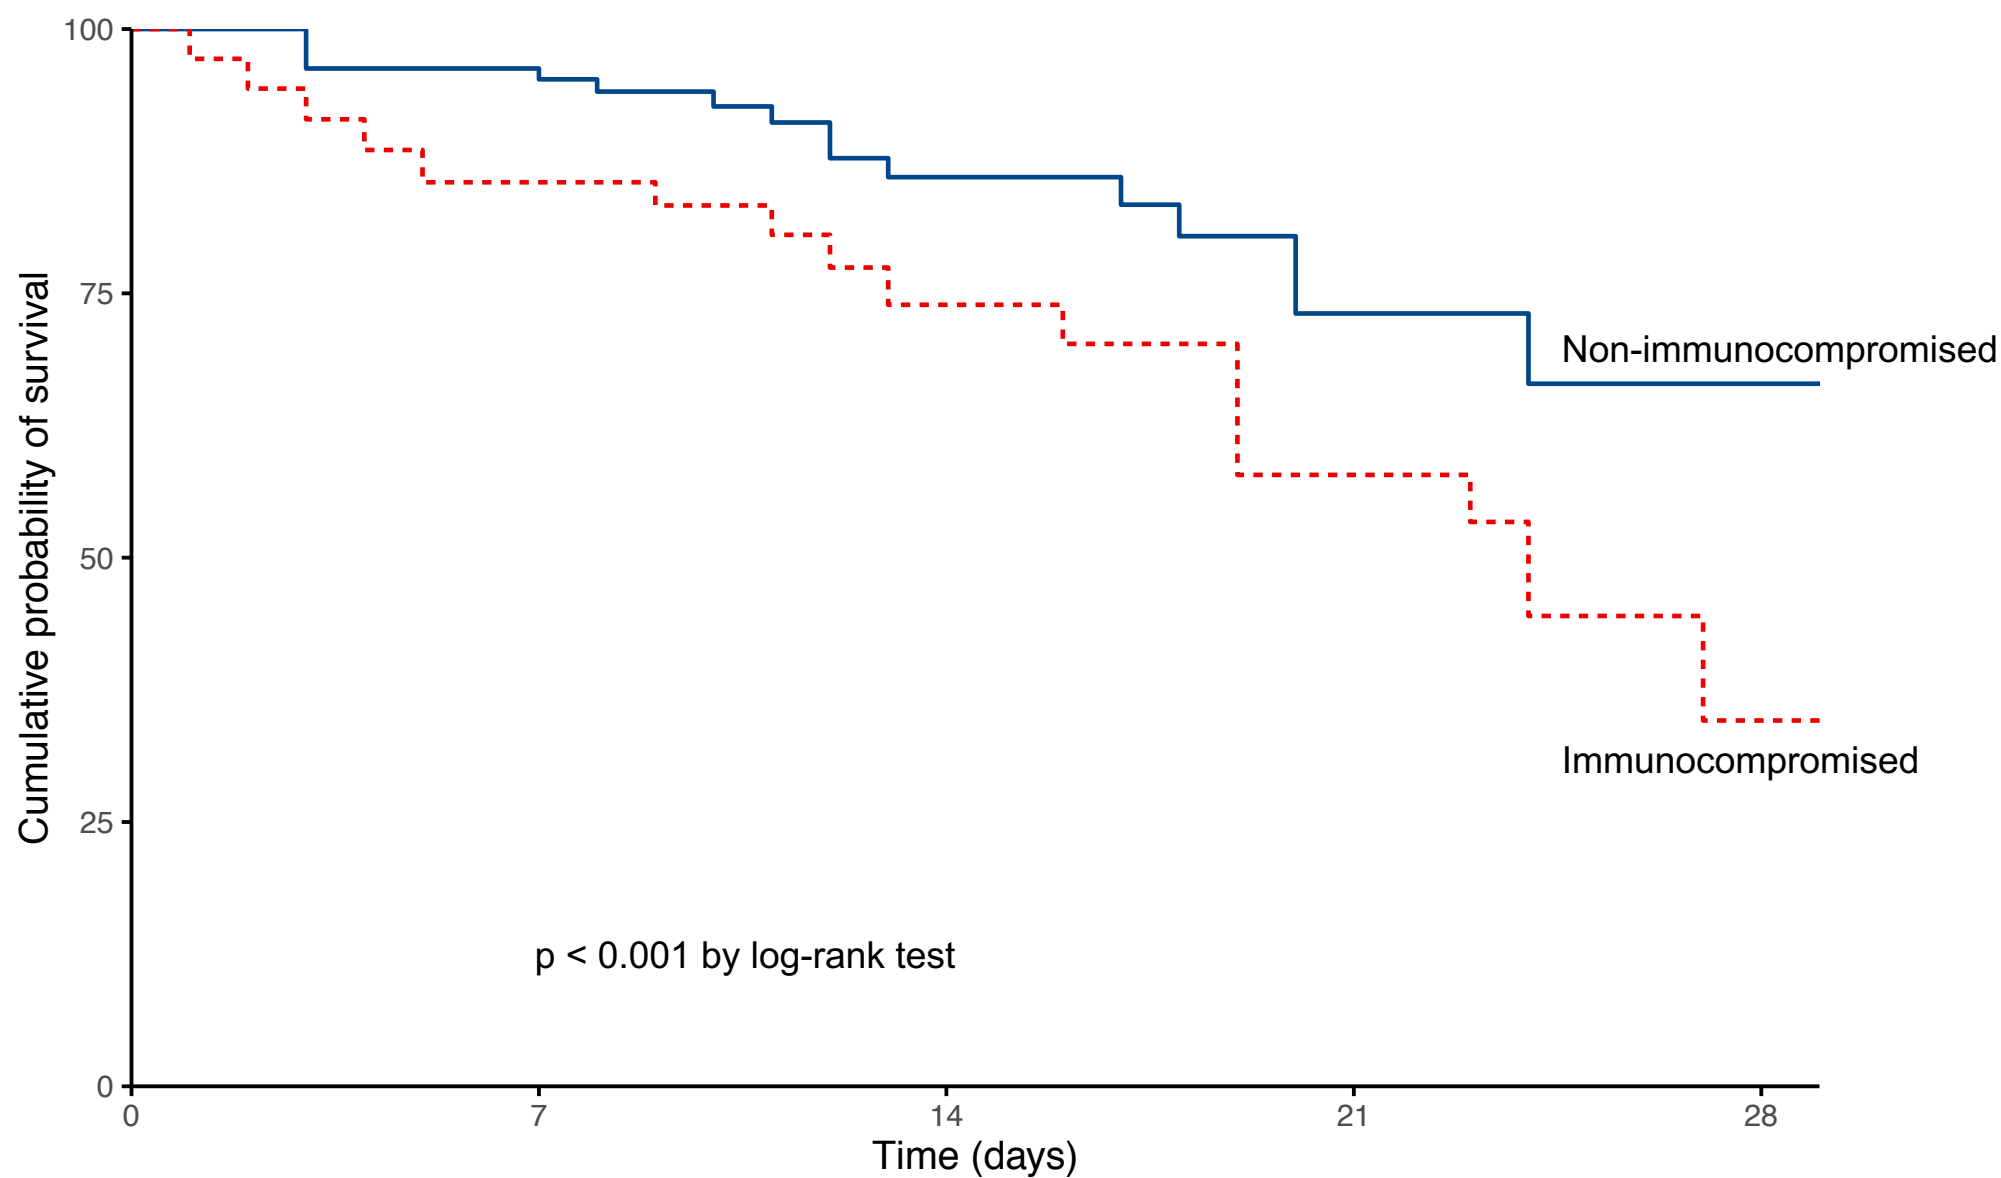

**Number at risk**

Non-immunocompromised

137

94

43

17

9

Immunocompromised

71

48

21

13

7
